# Supplementary material for: Electro-responsive 1-D nanomaterial driven broad-band reflection in chiral nematic liquid crystals
Source: Royal Society of Chemistry journal article supplement (doi:10.1039/c2tc00166g), 2012-10-22
Supplement: c2tc00166g.pdf [file c2tc00166g.pdf]

Supporting Information for:

**Electro-responsive 1-D nanomaterial driven broad-band reflection in chiral nematic liquid crystals**

*Fang Liu,<sup>a</sup> Jingjing Wang,<sup>a</sup> Zhenhua Ge,<sup>a</sup> Kexuan Li,<sup>a</sup> Hangjun Ding,<sup>a</sup> Boping Zhang,<sup>a</sup> Dong Wang<sup>a</sup> and Huai Yang<sup>\*a,b</sup>*

<sup>a</sup> *School of Materials Science and Engineering, University of Science and Technology Beijing, Beijing 100083, P. R. China. Fax: +86-10-62333969; Tel: +86-10-62333969; E-mail: [yanghuai@mater.ustb.edu.cn](mailto:yanghuai@mater.ustb.edu.cn) (H. Yang)*

<sup>b</sup> *Department of Materials Science and Engineering, College of Engineering, Peking University, Beijing 100871, P. R. China. E-mail: [yanghuai@coe.pku.edu.cn](mailto:yanghuai@coe.pku.edu.cn) (H. Yang)*

## Materials used in the experiment

The chiral nematic liquid crystal (N\*-LC) was obtained by doping a chiral dopant into a nematic liquid crystal (N-LC). The N-LC used was SLC10V513-200 (Yongsheng Huatsing Liquid Crystal Co., Ltd) with negative dielectric anisotropy. A left-handed chiral dopant (D1), 1,1-binaphthyl-2,2-diyl bis(4-(4-pentylcyclohexyl)benzoate), was synthesized according to the methods suggested by Zihui Cheng.<sup>S1</sup> The parameters of the N-LC and the chemical structures of the chiral dopant are showed in Figure S1. In our experiment, Bi<sub>2</sub>S<sub>3</sub> nanoparticles (NP) were prefabricated by mechanical alloying method<sup>S2</sup> and Bi<sub>2</sub>S<sub>3</sub> nanotubes (NT-1, NT-2) and nanowires (NW) were prepared by hydrothermal synthesis method.<sup>S3, S4</sup>

**(a) Nematic LC: SLC10V513-200 (YongshengHuatsing Liquid Crystal Co., Ltd)**

Parameters: S-N(K): < 233

Clearing Point (K): 365

$\Delta n$  (589 nm, 293 K): 0.15

$\Delta\epsilon$  (1 KHz, 298 K): -11.2

**(b) Chiral Dopant: 1,1-binaphthyl-2,2-diylbis(4-(4-pentylcyclohexyl)benzoate) (D1)**

Left-handed

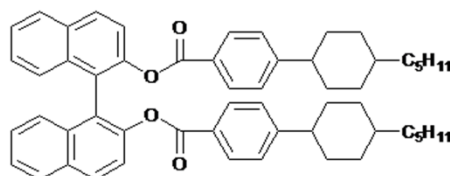

**Fig. S1** The parameters of the N-LC (a) and the chemical structures of the chiral dopant (b).

## Preparation of the samples

In order to achieve good dispersion, the mixtures with the N\*-LC and Bi<sub>2</sub>S<sub>3</sub> nanomaterials were dissolved in acetone and ultrasonicated for about 1.0 h. Then, the acetone was evaporated off completely for about 24.0 h above 318.0 K before the samples were placed in a vacuum system at 1023 Torr for 24.0 h at 323.0 K. To obtain homogeneous alignment, a 2.0 wt% polyvinyl alcohol (PVA) aqueous solution was coated onto the inner surfaces with indium/tin oxide of the cells. The deposited film was dried at 353.0 K for about 30.0 min, and subsequently rubbed with a textile cloth under a pressure of 2.0 g cm<sup>-2</sup> along one direction. The thickness of the cells was controlled as 20.0±1.0 μm. Subsequently, the empty cells were filled with the mixtures by capillary action at room temperature. An alternating current (AC) field with the strength ranging from 0.0 V/μm to 9.5 V/μm at 1.0 KHz was applied on the samples and the transmission spectra of the samples were collected by a UV/visible spectrophotometer (JASCO V-570).

### The time effect on the sample

The effect of time on the bandwidth of the composites was examined by applying the electric field on the samples at  $9.5 \text{ V } \mu\text{m}^{-1}$  for 60 min. The result of the NT-1/N\*-LC composite is depicted in Figure S2. It shows that the  $\Delta\lambda$  keeps invariant during 60 min.

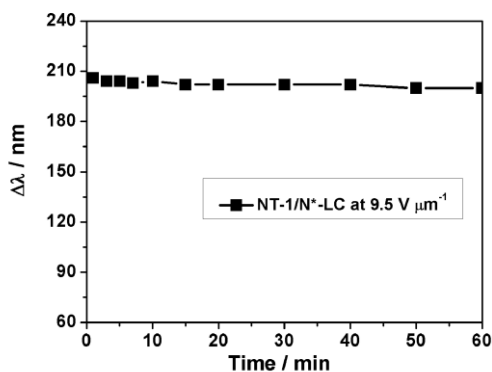

**Fig. S2** The effect of time on bandwidth of the NT-1/N\*-LC composite at  $9.5 \text{ V } \mu\text{m}^{-1}$ .

### References for supporting information

- [S1] Z. H. Cheng, K. X. Li, R. W. Guo, F. F. Wang, X. J. Wu, L. P. Zhang, J. M. Xiao, H. Cao, Z. Yang and H. Yang, *Liq. Cryst.*, 2011, **38**, 233.
- [S2] Z. H. Ge, B. P. Zhang and Z. X. Yu, *J. Mater. Res.*, 2011, **26**, 2711.
- [S3] Z. H. Ge, B. P. Zhang, Z. X. Yu and B. B. Jiang, *Cryst. Eng. Comm.*, 2012, **14**, 2283.
- [S4] Z. H. Ge, B. P. Zhang, P. P. Shang and J. F. Li, *J. Mater. Chem.*, 2011, **21**, 9194.
